# Supplementary figures and images for: The photophysical and photochemical behaviour of coumarin-derivatized zinc phthalocyanine when conjugated with gold nanoparticles and electrospun into polymer fibers
Source: Royal Society of Chemistry journal article supplement (doi:10.1039/c2nj40984d), 2012-11-30

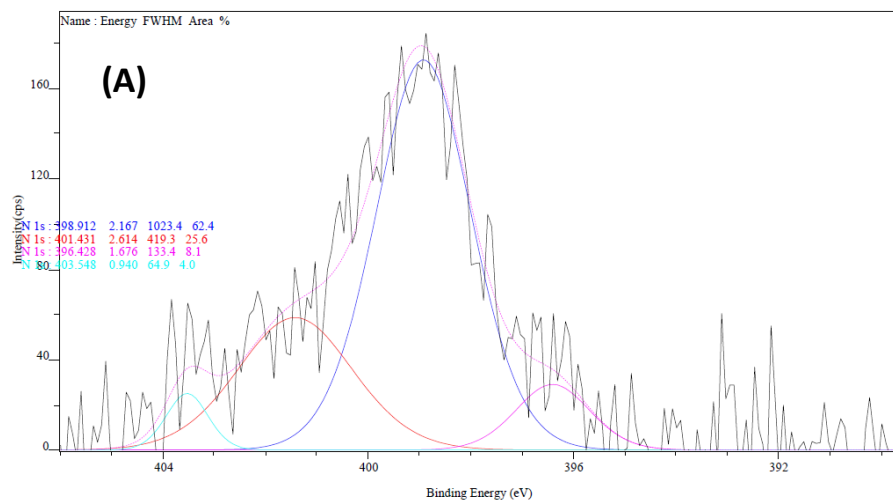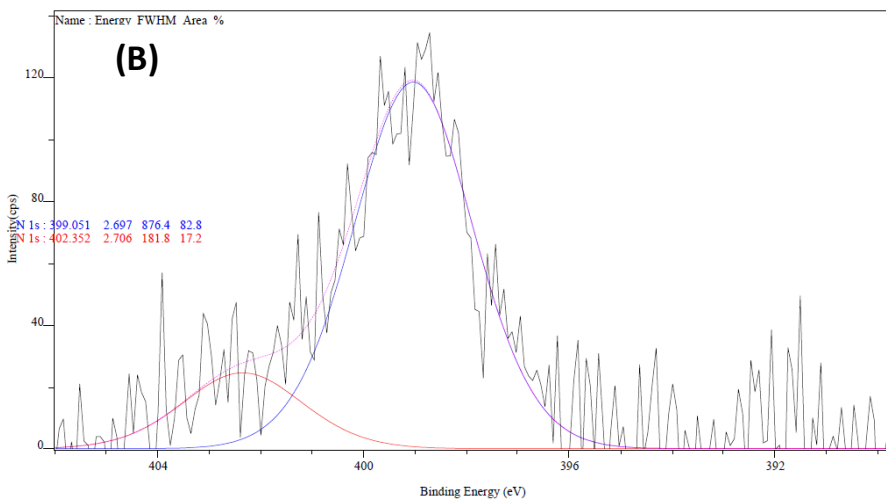

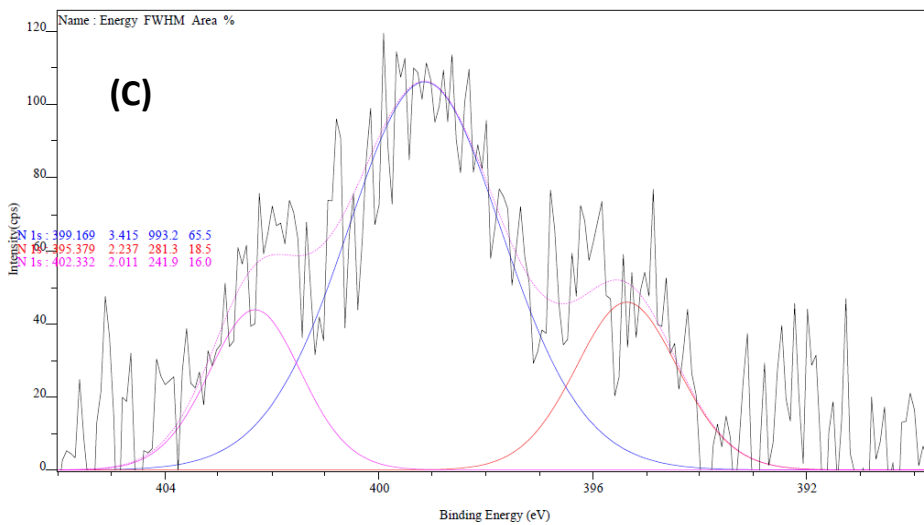

Fig. 1 High resolution XPS scans for (A) ZnTCMPc, (B) AuNPs and (C) ZnTCMPc-AuNP

Supplement: c2nj40984d.pdf [file c2nj40984d.pdf]
